# Supplementary material
Source: PubMed Central journal article supplement (PMC4564060)
Supplement: NIHMS718204-supplement-supplemental.pdf [file NIHMS718204-supplement-supplemental.pdf]

100 YEARS  
RSNA 2015

REGISTRATION NOW OPEN

Sign in | Register

100 YEARS  
RSNA  
Radiology

RSNA Publications Home Permissions Libraries Agencies Advertising

Radiology

Enter words / phrases / DOI

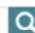

Advanced Search

Access provided by University of Pennsylvania Library

Journal Home

Browse by

About the Journal

Authors &amp; Reviewers

Subscriptions

CME

Radiology Select

RadioGraphics

Previous Article

August 2014  
Volume 272, Issue 2

Next Article

Original Research  
Breast Imaging**Identification of Intrinsic Imaging Phenotypes for Breast Cancer Tumors:  
Preliminary Associations with Gene Expression Profiles**

Ahmed Bilal Ashraf, PhD Dania Daye, PhD Sara Gavenonis, MD Carolyn Mies, MD Michael Feldman, MD, PhD Mark Rosen, MD, PhD Despina Kontos, PhD

From the Department of Radiology (A.B.A., D.D., S.G., M.R., D.K.) and Department of Pathology and Laboratory Medicine (C.M., M.F), University of Pennsylvania Perelman School of Medicine, 3600 Market St, Suite 360, Philadelphia, PA 19104.

Address correspondence to D.K. (e-mail: [Despina.Kontos@uphs.upenn.edu](mailto:Despina.Kontos@uphs.upenn.edu)).DOI: <http://dx.doi.org/10.1148/radiol.14131375>

Abstract Full Text Figures References Supplemental Materials Cited by PDF

© RSNA 2014

PODCAST

**Intrinsic Imaging Phenotypes in Breast Cancer Tumors**[Listen to this Discussion](#) [Duration: 10:06]**Moderator:** Deborah Levine, MD, Senior Deputy Editor of *Radiology***Guest:** Ahmed Bilal Ashraf, PhD, Department of Radiology, University of Pennsylvania Perelman School of Medicine, Philadelphia, Pa**Article Discussed:** Identification of intrinsic imaging phenotypes for breast cancer tumors: preliminary associations with gene expression profiles. *Ashraf AB, Daye D, Gavenonis S, et al. Radiology 2014;272(2):374-384.*

## Article Tools

[Open in Image Viewer](#)[Add to myRSNA](#)[Add to Favorites](#)[Email to a Friend](#)[Download Citation](#)[Track Citations](#)[Rights & Permissions](#)

## Related Materials

## Journal Articles

[Locally Advanced Breast Cancer: MR Imaging for Prediction of Response to Neoadjuvant Chemotherapy —Results from ACRIN 6657/I-SPY TRIAL](#)Hylton et al. *Radiology*. (2012)[Undiagnosed Breast Cancer at MR Imaging: Analysis of Causes](#)Pages et al. *Radiology*. (2012)[Novel Oncologic Drugs: What They Do and How They Affect Images](#)Figueiras et al. *RadioGraphics* (2011)[Advancements in MR Imaging of the Prostate: From Diagnosis to Interventions](#)Bonekamp et al. *RadioGraphics* (2011)[Early Diagnosis of Ovarian Carcinoma: Is a Solution in Sight?](#)Lutz et al. *Radiology*. (2011)[See More](#)

## Related Materials

## RSNA 2014 Education Exhibits

[\(What's this?\)](#)[The Latest Imaging Assessment for Anti-Tumor Therapy: Therapeutic Response for Various Tumors Using PET/CT or PET/MRI](#)[Kinetic Parametric Imaging of Breast Cancer using Dynamic Contrast-Enhanced MRI with Routine Clinical](#)

SUPPLEMENTAL FIGURES

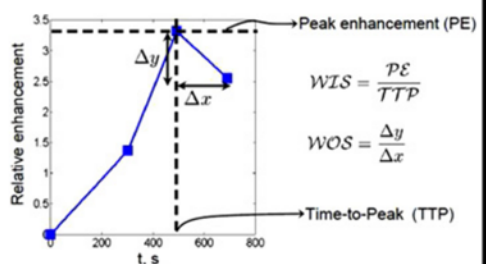

a.

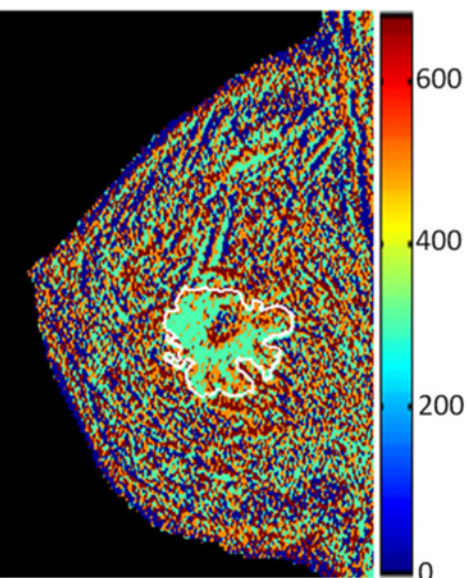

b.

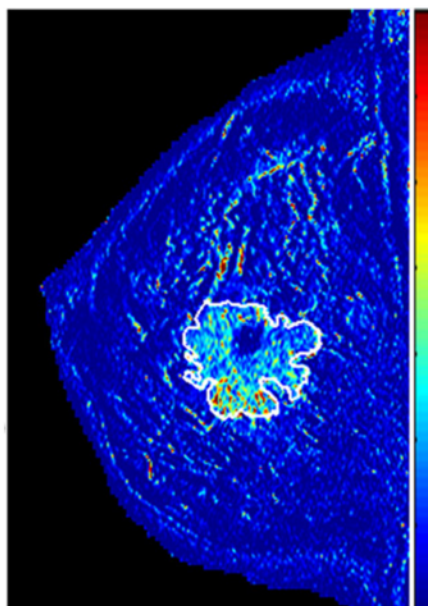

c.

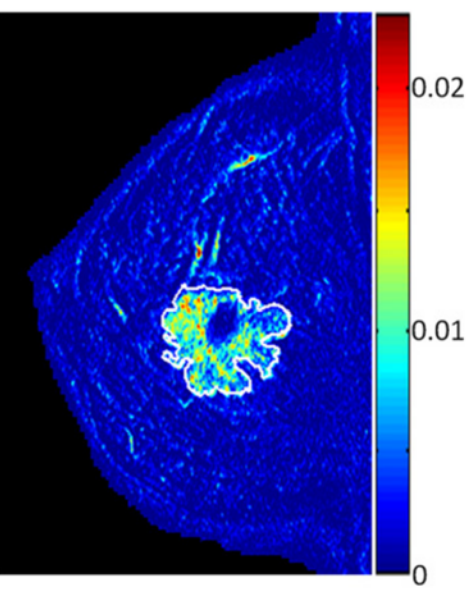

d.

Protocols

[Functional Imaging of the Pleura: Applications in Oncology](#)

[Current Concepts in Evaluation of Response to Neoadjuvant Chemotherapy in Breast Cancer](#)

[Functional MRI of Liver Tumors](#)

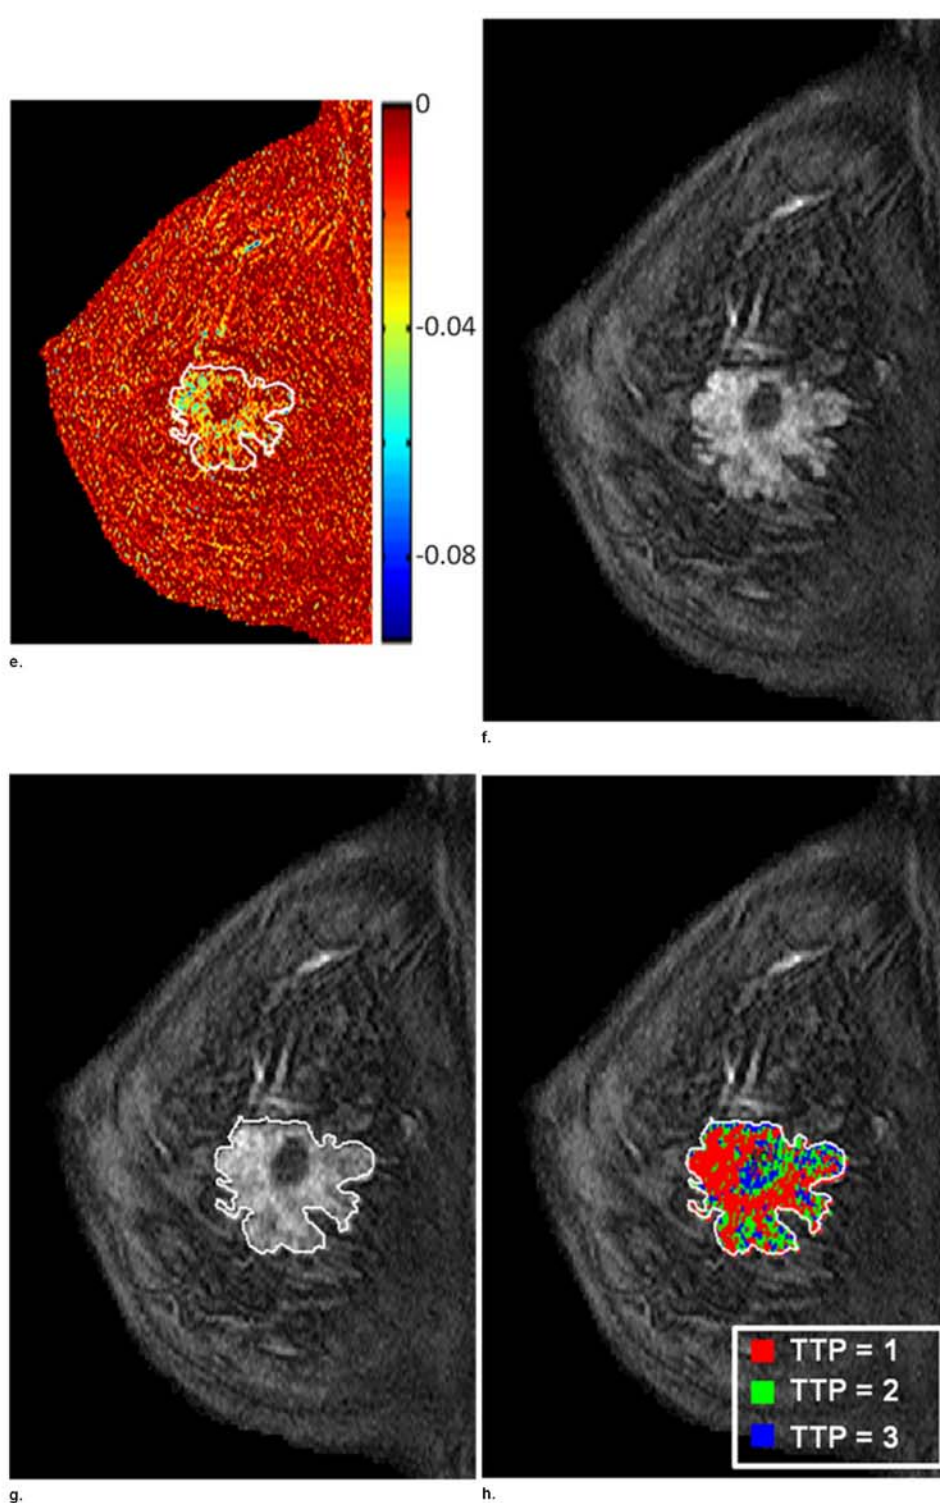

**Figure E1:**

Extraction of heterogeneity kinetic statistic features. (a) Kinetic curve of relative enhancement for a single pixel. (b–e) Pixel-wise maps of TTP (b), peak enhancement (c), wash-in slope (d), and washout slope (e). (f) First postcontrast image. (g) Image shows segmented lesion. (h) Image shows partitioning of tumor pixels based on their TTP value: Set 1 pixels (red) represent tumor areas with rapid uptake having peak enhancement at the first postcontrast time point (TTP = 1); set 2 pixels (green) have peak enhancement at the second time point (TTP = 2); and set 3 pixels (blue) have slow peak enhancement at the third time point (TTP = 3).

▲ [Back To Top](#)



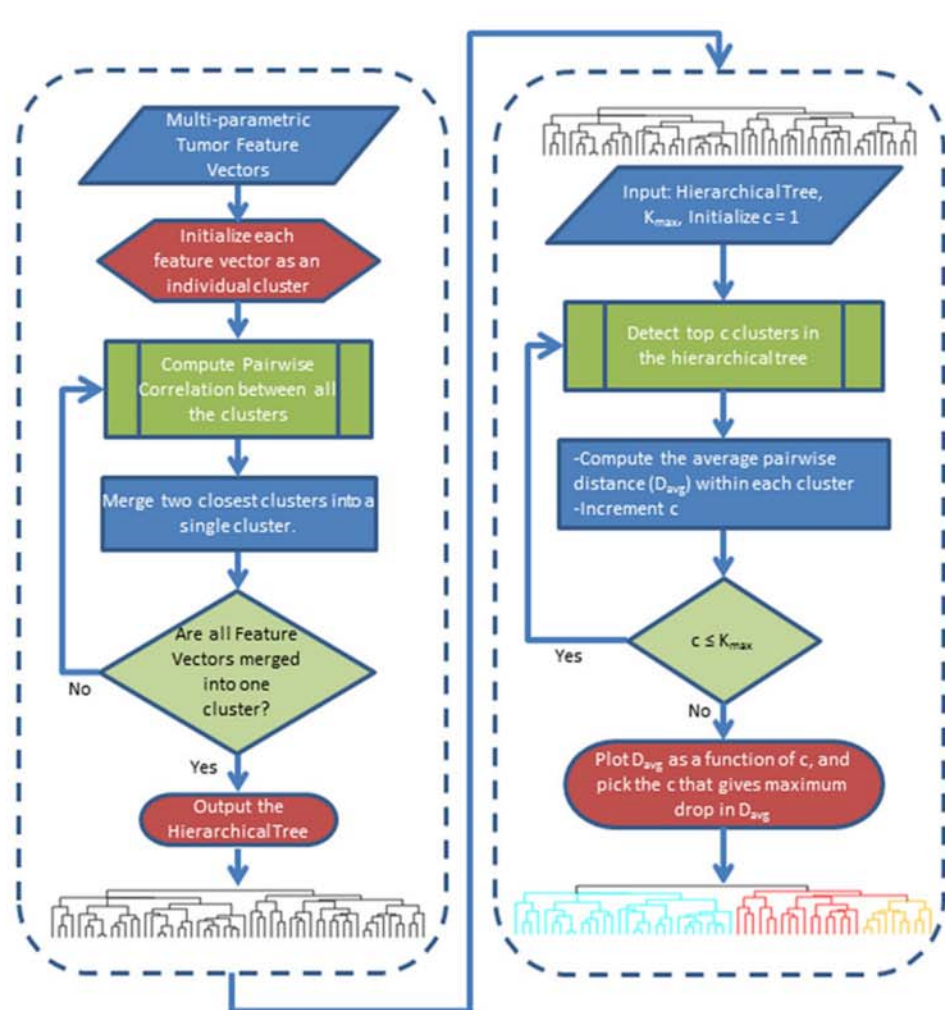

Figure E2:

Flowchart of the imaging phenotype discovery clustering algorithm. Stage 1: Steps for generating a hierarchical tree (ie, dendrogram) of tumors based on the extracted imaging features. Stage 2: Steps for determining the optimal number of distinct phenotypes (ie, clusters) hierarchical tree.

▲ Back To Top

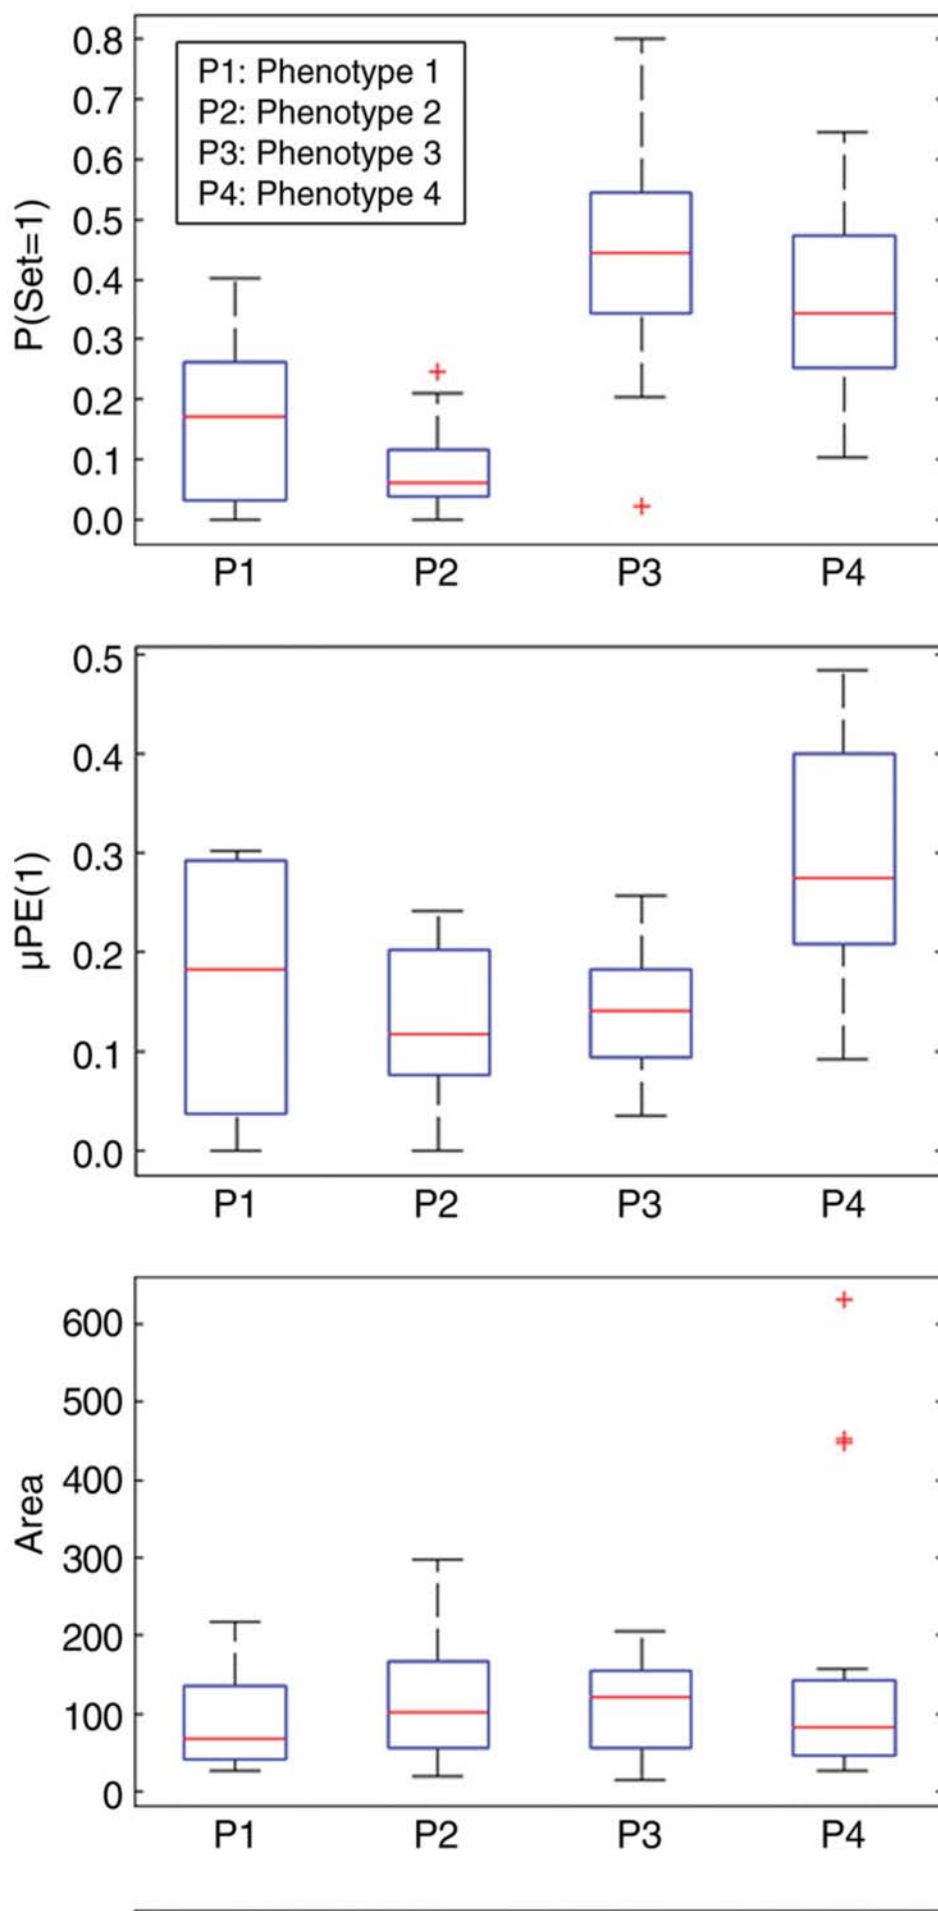

## Figure E3:

Box plots of representative DCE MR imaging features for each of the four detected phenotypes (P1, P2, P3, P4).  $\mu$ PE = maximum peak enhancement,  $P(\text{Set} = 1)$  = proportion of pixels with TTP of 1. Red lines are medians, edges of boxes are 25th and 75th percentiles, and whiskers extend to the most extreme data points not considered as outliers (+).

▲ Back To Top

## SUPPLEMENTAL TABLE

Table E1. Study Population Characteristics within Each of the Four Detected Phenotypes

| Characteristic                | Phenotype 1     | Phenotype 2     | Phenotype 3    | Phenotype 4    |
|-------------------------------|-----------------|-----------------|----------------|----------------|
| No. of patients ( $n = 56$ )  | 7 (12)          | 18 (32)         | 15 (27)        | 16 (28)        |
| <b>Tumor type</b>             |                 |                 |                |                |
| Ductal                        | 6 (86)          | 16 (89)         | 15 (100)       | 15 (94)        |
| Lobular                       | 1 (14)          | 2 (11)          | 0 (0)          | 1 (6.2)        |
| <b>Tumor grade</b>            |                 |                 |                |                |
| T1a                           | 3 (43)          | 1 (5.6)         | 1 (6.7%)       | 2 (12)         |
| T1b                           | 3 (43)          | 2 (11)          | 8 (53)         | 6 (38)         |
| T1c                           | 1 (14)          | 14 (78)         | 4 (27)         | 5 (31)         |
| T2                            | 0 (0)           | 1 (5.6)         | 2 (13)         | 2 (12)         |
| Tx                            | 0 (0)           | 0 (0)           | 0 (0)          | 1 (6.2)        |
| <b>PR status</b>              |                 |                 |                |                |
| Positive                      | 6 (86)          | 17 (94)         | 13 (87)        | 14 (88)        |
| Negative                      | 1 (14)          | 1 (5.6)         | 2 (13)         | 2 (12)         |
| <b>Nodal status</b>           |                 |                 |                |                |
| N0                            | 7 (100)         | 17 (94)         | 14 (93)        | 15 (94)        |
| N1                            | 0 (0)           | 1 (5.6)         | 1 (6.7)        | 1 (6.2)        |
| <b>Patient ethnicity</b>      |                 |                 |                |                |
| White                         | 3 (43)          | 11 (61)         | 7 (47)         | 7 (44)         |
| African American              | 1 (14)          | 1 (5.6)         | 2 (13)         | 3 (19)         |
| Asian                         | 0 (0)           | 1 (5.6)         | 0 (0)          | 0 (0)          |
| Other                         | 1 (14)          | 1 (5.6)         | 1 (6.7)        | 1 (6.2)        |
| Unknown                       | 2 (28)          | 4 (22.)         | 5 (33)         | 5 (31)         |
| <b>Patient age (y)</b>        |                 |                 |                |                |
| Range                         | 51–75           | 39–76           | 48–70          | 41–72          |
| Mean                          | 60.86           | 53.65           | 59.38          | 54.87          |
| <b>Tumor size</b>             |                 |                 |                |                |
| Range                         | 0.5–1.5         | 0.6–2.0         | 0.6–2.2        | 0.4–3.3        |
| Mean $\pm$ standard deviation | 0.94 $\pm$ 1.36 | 1.28 $\pm$ 0.41 | 1.2 $\pm$ 0.49 | 1.2 $\pm$ 0.72 |

Note.—Numbers in parentheses are percentages.

▲ Back To Top

## Related Materials

## Journal Articles

[Locally Advanced Breast Cancer: MR Imaging for Prediction of Response to Neoadjuvant Chemotherapy—Results from ACRIN 6657I-SPY TRIAL](#)

Hylton et al. *Radiology*. (2012)

[Undiagnosed Breast Cancer at MR Imaging: Analysis of Causes](#)

Pages et al. *Radiology*. (2012)

[Novel Oncologic Drugs: What They Do and How They Affect Images](#)

Figueiras et al. *RadioGraphics*. (2011)

[Advancements in MR Imaging of the Prostate: From Diagnosis to Interventions](#)

Bonekamp et al. *RadioGraphics*. (2011)

[Early Diagnosis of Ovarian Carcinoma: Is a Solution in Sight?](#)

Lutz et al. *Radiology*. (2011)

[See More](#)

### Related Materials

#### RSNA 2014 Education Exhibits

[\(What's this?\)](#)

[The Latest Imaging Assessment for Anti-Tumor Therapy: Therapeutic Response for Various Tumors Using PET/CT or PET/MRI](#)

[Kinetic Parametric Imaging of Breast Cancer using Dynamic Contrast-Enhanced MRI with Routine Clinical Protocols](#)

[Functional Imaging of the Pleura: Applications in Oncology](#)

[Current Concepts in Evaluation of Response to Neoadjuvant Chemotherapy in Breast Cancer](#)

[Functional MRI of Liver Tumors](#)

[RSNA News™](#) [Career Connect™](#) [Advertising](#) [Event Calendar](#) [Employment](#) [Terms of Use](#) [Contact Us](#)

Copyright © 2015 Radiological Society of North America | TEL 1-630-571-2670 | TOLL FREE US and Canada: 1-800-381-6660 | Membership 1-877-RSNA-MEM (776-2636)
